# Supplementary material for: Energetic alliance of tetrazole-1-oxides and 1,2,5-oxadiazoles
Source: Royal Society of Chemistry journal article supplement (doi:10.1039/c4nj01351d), 2014-10-09
Supplement: c4nj01351d1.pdf [file c4nj01351d1.pdf]

## Supplementary Information

### Energetic Alliance of Tetrazole-1-oxides and 1,2,5-Oxadiazoles

Dennis Fischer, Thomas M. Klapötke, Marius Reymann, Jörg Stierstorfer and Maurus B. R. Völkl

Department of Chemistry, Energetic Materials Research, Ludwig Maximilian University  
Butenandtstr. 5–13 (D), 81377 München (Germany)

#### Content

|     |                               |   |
|-----|-------------------------------|---|
| 1   | X-ray Diffraction .....       | 1 |
| 2   | Computations.....             | 5 |
| 2.1 | Heat of Formation .....       | 5 |
| 2.2 | Detonation Parameters .....   | 7 |
| 3   | Experimental Procedures ..... | 7 |
| 4   | References .....              | 8 |

#### 1 X-ray Diffraction

Suitable single crystals of the described compounds (**3–6**, **11,12**, **14–17**, **20** and **23**) were measured by X-ray diffraction. For all compounds, an Oxford Xcalibur3 diffractometer with a CCD area detector was employed for data collection using Mo-K $\alpha$  radiation ( $\lambda = 0.71073 \text{ \AA}$ ). By using the CRYCALISPRO software<sup>[S1]</sup> the data collection and reduction were performed. The structures were solved by direct methods (SIR-92<sup>[S3]</sup>, SIR-97<sup>[S3]</sup> or SHELXS-97<sup>[S4]</sup>) and refined by full-matrix least-squares on *F*<sup>2</sup> (SHELXL <sup>[S4]</sup>) and finally checked using the PLATON software <sup>[S5]</sup> integrated in the WinGX software suite<sup>[S6]</sup>. The non-hydrogen atoms were refined anisotropically and the hydrogen atoms were located and freely refined. The absorptions were corrected by a SCALE3 ABSPACK multiscan method<sup>[S7]</sup>. In the case of chiral space groups “Friedel pairs” were merged using the SHELX command “MERG 3”. DIAMOND2 plots are shown with thermal ellipsoids at the 50% probability level.

**Table S1** Crystallographic data of **3–6**.

| <b>Compound</b>                             | <b>3</b>                                                    | <b>4</b>                                                    | <b>5</b>                                                                    | <b>6</b>                                                                    |
|---------------------------------------------|-------------------------------------------------------------|-------------------------------------------------------------|-----------------------------------------------------------------------------|-----------------------------------------------------------------------------|
| Formula                                     | C <sub>4</sub> H <sub>6</sub> N <sub>6</sub> O <sub>3</sub> | C <sub>4</sub> H <sub>6</sub> N <sub>6</sub> O <sub>4</sub> | C <sub>4</sub> H <sub>2</sub> Cl <sub>2</sub> N <sub>4</sub> O <sub>3</sub> | C <sub>4</sub> H <sub>2</sub> Cl <sub>2</sub> N <sub>4</sub> O <sub>4</sub> |
| FW<br>[g mol <sup>-1</sup> ]                | 186.15                                                      | 202.15                                                      | 225.00                                                                      | 241.00                                                                      |
| Crystal system                              | monoclinic                                                  | monoclinic                                                  | monoclinic                                                                  | orthorhombic                                                                |
| Space Group                                 | C2/c (No. 15)                                               | P2 <sub>1</sub> /n (No. 14)                                 | P2 <sub>1</sub> /n (No. 14)                                                 | P2 <sub>1</sub> 2 <sub>1</sub> 2 <sub>1</sub> (No. 19)                      |
| Color/Habit                                 | colorless rod                                               | colorless block                                             | light-yellow block                                                          | colorless plate                                                             |
| Size [mm]                                   | 0.10×0.28×0.32                                              | 0.14×0.19×0.23                                              | 0.17×0.23×0.47                                                              | 0.04×0.24×0.25                                                              |
| <i>a</i> [Å]                                | 12.844(3)                                                   | 6.9708(14)                                                  | 8.2678(6)                                                                   | 6.9850(5)                                                                   |
| <i>b</i> [Å]                                | 8.919(5)                                                    | 14.408(2)                                                   | 11.2186(7)                                                                  | 8.4845(5)                                                                   |
| <i>c</i> [Å]                                | 6.988(4)                                                    | 7.8104(13)                                                  | 8.5693(5)                                                                   | 13.8574(9)                                                                  |
| α [°]                                       | 90                                                          | 90                                                          | 90                                                                          | 90                                                                          |
| β [°]                                       | 112.147(5)                                                  | 105.99(2)                                                   | 99.912(6)                                                                   | 90                                                                          |
| γ [°]                                       | 90                                                          | 90                                                          | 90                                                                          | 90                                                                          |
| <i>V</i> [Å <sup>3</sup> ]                  | 741.5(6)                                                    | 754.1(2)                                                    | 782.97(9)                                                                   | 821.25(9)                                                                   |
| <i>Z</i>                                    | 4                                                           | 4                                                           | 4                                                                           | 4                                                                           |
| ρ <sub>calc.</sub><br>[g cm <sup>-3</sup> ] | 1.668                                                       | 1.781                                                       | 1.909                                                                       | 1.949                                                                       |
| μ [mm <sup>-1</sup> ]                       | 0.143                                                       | 0.158                                                       | 0.807                                                                       | 0.785                                                                       |
| <i>F</i> (000)                              | 384                                                         | 416                                                         | 448                                                                         | 480                                                                         |
| λ <sub>MoKα</sub> [Å]                       | 0.71073                                                     | 0.71073                                                     | 0.71073                                                                     | 0.71073                                                                     |
| <i>T</i> [K]                                | 100                                                         | 173                                                         | 100                                                                         | 100                                                                         |
| θ min-max<br>[°]                            | 4.6, 26.0                                                   | 4.5, 26.5                                                   | 4.2, 26.0                                                                   | 4.1, 26.0                                                                   |
| Dataset <i>h</i> ;<br><i>k</i> ; <i>l</i>   | -13:15;-10:10;-8:8                                          | -8:7; -17:18;<br>-9:9                                       | -10:10;-13:13;-10:10                                                        | -8:4;-10:10;-16:17                                                          |
| Reflect.<br>coll.                           | 2426                                                        | 3900                                                        | 5523                                                                        | 4265                                                                        |
| Independ.<br>refl.                          | 725                                                         | 1547                                                        | 1531                                                                        | 1607                                                                        |
| <i>R</i> <sub>int</sub>                     | 0.037                                                       | 0.026                                                       | 0.035                                                                       | 0.037                                                                       |
| Reflection<br>obs.                          | 725                                                         | 1301                                                        | 1531                                                                        | 1607                                                                        |
| No.<br>parameters                           | 72                                                          | 151                                                         | 126                                                                         | 135                                                                         |
| <i>R</i> <sub>1</sub> (obs)                 | 0.0388                                                      | 0.0485                                                      | 0.0291                                                                      | 0.0270                                                                      |
| w <i>R</i> <sub>2</sub> (all<br>data)       | 0.1058                                                      | 0.1288                                                      | 0.0736                                                                      | 0.0616                                                                      |
| <i>S</i>                                    | 1.08                                                        | 1.14                                                        | 1.06                                                                        | 1.04                                                                        |
| Resd.<br>Dens.<br>[e Å <sup>-3</sup> ]      | -0.23, 0.22                                                 | -0.22, 0.34                                                 | -0.31, 0.31                                                                 | -0.26, 0.55                                                                 |
| Device type                                 | Oxford Xcalibur3<br>CCD                                     | Oxford<br>Xcalibur3 CCD                                     | Oxford Xcalibur3<br>CCD                                                     | Oxford Xcalibur3<br>CCD                                                     |
| Solution                                    | SHELXS-97                                                   | SIR-97                                                      | SIR-92                                                                      | SIR-92                                                                      |
| Refinement                                  | SHELXL-97                                                   | SHELXL-97                                                   | SHELXL-97                                                                   | SHELXL-97                                                                   |
| Absorpt.<br>corr.                           | multi-scan                                                  | multi-scan                                                  | multi-scan                                                                  | multi-scan                                                                  |
| CCDC                                        | 988408                                                      | 988403                                                      | 988407                                                                      | 988406                                                                      |

**Table S2** Crystallographic data of **11**, **12**, **14** and **15**.

| <b>Compound</b>                          | <b>11</b>                                                                   | <b>12</b>                                                    | <b>14</b>                                                     | <b>15</b>                                                    |
|------------------------------------------|-----------------------------------------------------------------------------|--------------------------------------------------------------|---------------------------------------------------------------|--------------------------------------------------------------|
| Formula                                  | K <sub>2</sub> C <sub>4</sub> H <sub>4</sub> N <sub>10</sub> O <sub>5</sub> | K <sub>2</sub> C <sub>4</sub> N <sub>10</sub> O <sub>4</sub> | C <sub>4</sub> H <sub>10</sub> N <sub>12</sub> O <sub>7</sub> | C <sub>4</sub> H <sub>8</sub> N <sub>12</sub> O <sub>3</sub> |
| FW [g mol <sup>-1</sup> ]                | 350.37                                                                      | 330.34                                                       | 338.24                                                        | 272.18                                                       |
| Crystal system                           | monoclinic                                                                  | triclinic                                                    | monoclinic                                                    | orthorhombic                                                 |
| Space Group                              | <i>P</i> 2 <sub>1</sub> / <i>c</i> (No. 14)                                 | <i>P</i> -1 (No. 2)                                          | <i>P</i> 2 <sub>1</sub> (No. 4)                               | <i>Pbca</i> (No. 61)                                         |
| Color/Habit                              | colorless block                                                             | colorless rod                                                | colorless block                                               | colorless needles                                            |
| Size [mm]                                | 0.12×0.19×0.26                                                              | 0.09×0.13×0.20                                               | 0.11×0.18×0.31                                                | 0.04×0.07×0.15                                               |
| <i>a</i> [Å]                             | 7.4337(4)                                                                   | 7.1412(6)                                                    | 8.0286(12)                                                    | 14.5573(13)                                                  |
| <i>b</i> [Å]                             | 21.6146(9)                                                                  | 7.2056(8)                                                    | 8.0668(11)                                                    | 7.5523(7)                                                    |
| <i>c</i> [Å]                             | 7.5901(4)                                                                   | 11.4980(9)                                                   | 9.6666(15)                                                    | 19.5093(14)                                                  |
| α [°]                                    | 90                                                                          | 89.658(7)                                                    | 90                                                            | 90                                                           |
| β [°]                                    | 97.741(5)                                                                   | 73.514(7)                                                    | 90.004(12)                                                    | 90                                                           |
| γ [°]                                    | 90                                                                          | 64.814(9)                                                    | 90                                                            | 90                                                           |
| <i>V</i> [Å <sup>3</sup> ]               | 1208.44(10)                                                                 | 508.88(9)                                                    | 626.06(16)                                                    | 2144.9(3)                                                    |
| <i>Z</i>                                 | 4                                                                           | 2                                                            | 2                                                             | 8                                                            |
| ρ <sub>calc.</sub> [g cm <sup>-3</sup> ] | 1.926                                                                       | 2.156                                                        | 1.794                                                         | 1.686                                                        |
| μ [mm <sup>-1</sup> ]                    | 0.830                                                                       | 0.972                                                        | 0.165                                                         | 0.143                                                        |
| <i>F</i> (000)                           | 704                                                                         | 328                                                          | 348                                                           | 1120                                                         |
| λ <sub>MoKα</sub> [Å]                    | 0.71073                                                                     | 0.71073                                                      | 0.71073                                                       | 0.71073                                                      |
| <i>T</i> [K]                             | 400                                                                         | 100                                                          | 173                                                           | 293                                                          |
| θ min-max [°]                            | 4.2, 26.0                                                                   | 4.2, 26.0                                                    | 4.2, 27.5                                                     | 4.2, 27.0                                                    |
| Dataset <i>h</i> ; <i>k</i> ; <i>l</i>   | -9:9; -25:26;<br>-8:9                                                       | -8:8; -8:8; -14:14                                           | -9:10; -10:9; -12:9                                           | -11:18; -9:4; -21:24                                         |
| Reflect. coll.                           | 9113                                                                        | 7459                                                         | 3674                                                          | 5832                                                         |
| Independ. refl.                          | 2362                                                                        | 1985                                                         | 1544                                                          | 2335                                                         |
| <i>R</i> <sub>int</sub>                  | 0.031                                                                       | 0.037                                                        | 0.036                                                         | 0.047                                                        |
| Reflection obs.                          | 2093                                                                        | 1985                                                         | 1544                                                          | 1518                                                         |
| No. parameters                           | 206                                                                         | 181                                                          | 248                                                           | 204                                                          |
| <i>R</i> <sub>1</sub> (obs)              | 0.0254                                                                      | 0.0255                                                       | 0.0346                                                        | 0.0465                                                       |
| <i>wR</i> <sub>2</sub> (all data)        | 0.0610                                                                      | 0.0595                                                       | 0.0635                                                        | 0.0959                                                       |
| <i>S</i>                                 | 1.05                                                                        | 1.07                                                         | 1.04                                                          | 1.01                                                         |
| Resd. Dens. [e Å <sup>-3</sup> ]         | -0.28, 0.27                                                                 | -0.23, 0.32                                                  | -0.22, 0.23                                                   | -0.24, 0.21                                                  |
| Device type                              | Oxford Xcalibur3 CCD                                                        | Oxford Xcalibur3 CCD                                         | Oxford Xcalibur3 CCD                                          | Oxford Xcalibur3 CCD                                         |
| Solution                                 | SIR-92                                                                      | SIR-92                                                       | SIR-92                                                        | SHELXS-97                                                    |
| Refinement                               | SHELXL-97                                                                   | SHELXL-97                                                    | SHELXL-97                                                     | SHELXL-97                                                    |
| Absorpt. corr.                           | multi-scan                                                                  | multi-scan                                                   | multi-scan                                                    | multi-scan                                                   |
| CCDC                                     | 988412                                                                      | 988409                                                       | 988405                                                        | 988414                                                       |

**Table S3** Crystallographic data of **16**, **17**, **20** and **23**.

| Compound                                 | 16                                                           | 17                                                            | 20                                                            | 23                                                            |
|------------------------------------------|--------------------------------------------------------------|---------------------------------------------------------------|---------------------------------------------------------------|---------------------------------------------------------------|
| Formula                                  | C <sub>4</sub> H <sub>8</sub> N <sub>12</sub> O <sub>4</sub> | C <sub>4</sub> H <sub>10</sub> N <sub>14</sub> O <sub>3</sub> | C <sub>6</sub> H <sub>12</sub> N <sub>16</sub> O <sub>4</sub> | C <sub>6</sub> H <sub>14</sub> N <sub>18</sub> O <sub>4</sub> |
| FW [g mol <sup>-1</sup> ]                | 288.22                                                       | 302.26                                                        | 372.32                                                        | 402.35                                                        |
| Crystal system                           | monoclinic                                                   | triclinic                                                     | monoclinic                                                    | monoclinic                                                    |
| Space Group                              | <i>P</i> 2 <sub>1</sub> / <i>n</i> (No. 14)                  | <i>P</i> -1 (No. 2)                                           | <i>C</i> 2/ <i>c</i> (No. 15)                                 | <i>P</i> 2 <sub>1</sub> / <i>n</i> (No. 14)                   |
| Color/Habit                              | colorless rod                                                | colorless plate                                               | colorless block                                               | colorless block                                               |
| Size [mm]                                | 0.10x0.15x0.20                                               | 0.05x0.12x0.36                                                | 0.13x0.21x0.29                                                | 0.20x0.23x0.25                                                |
| <i>a</i> [Å]                             | 7.5509(13)                                                   | 3.7659(3)                                                     | 14.7455(8)                                                    | 7.0135(7)                                                     |
| <i>b</i> [Å]                             | 7.8440(15)                                                   | 11.0046(14)                                                   | 11.7557(6)                                                    | 31.347(2)                                                     |
| <i>c</i> [Å]                             | 18.562(3)                                                    | 14.3912(16)                                                   | 10.6941(6)                                                    | 7.9795(7)                                                     |
| α [°]                                    | 90                                                           | 97.056(10)                                                    | 90                                                            | 90                                                            |
| β [°]                                    | 94.987(16)                                                   | 95.040(8)                                                     | 129.904(5)                                                    | 115.793(12)                                                   |
| γ [°]                                    | 90                                                           | 98.978(9)                                                     | 90                                                            | 90                                                            |
| <i>V</i> [Å <sup>3</sup> ]               | 1095.3(3)                                                    | 581.14(11)                                                    | 1422.05(17)                                                   | 1579.5(3)                                                     |
| <i>Z</i>                                 | 4                                                            | 2                                                             | 4                                                             | 4                                                             |
| ρ <sub>calc.</sub> [g cm <sup>-3</sup> ] | 1.748                                                        | 1.727                                                         | 1.739                                                         | 1.692                                                         |
| μ [mm <sup>-1</sup> ]                    | 0.152                                                        | 0.146                                                         | 0.146                                                         | 0.142                                                         |
| <i>F</i> (000)                           | 592                                                          | 312                                                           | 768                                                           | 832                                                           |
| λ <sub>MoKα</sub> [Å]                    | 0.71073                                                      | 0.71073                                                       | 0.71073                                                       | 0.71073                                                       |
| <i>T</i> [K]                             | 293                                                          | 236                                                           | 100                                                           | 100                                                           |
| θ min-max [°]                            | 4.4, 26.0                                                    | 4.3, 27.0                                                     | 4.3, 26.7                                                     | 4.2, 26.3                                                     |
| Dataset <i>h</i> ; <i>k</i> ; <i>l</i>   | -9:9; -9:9; -22:14                                           | -4:4; -14:13,<br>-15:18                                       | -13:18; -14:14; -13:13                                        | -6:8; -38:39; -9:9                                            |
| Reflect. coll.                           | 5459                                                         | 4048                                                          | 5356                                                          | 8257                                                          |
| Independ. refl.                          | 2140                                                         | 2518                                                          | 1503                                                          | 3158                                                          |
| <i>R</i> <sub>int</sub>                  | 0.036                                                        | 0.027                                                         | 0.031                                                         | 0.034                                                         |
| Reflection obs.                          | 1624                                                         | 1735                                                          | 1503                                                          | 3158                                                          |
| No. parameters                           | 213                                                          | 230                                                           | 147                                                           | 309                                                           |
| <i>R</i> <sub>1</sub> (obs)              | 0.0386                                                       | 0.0446                                                        | 0.0366                                                        | 0.0374                                                        |
| w <i>R</i> <sub>2</sub> (all data)       | 0.1018                                                       | 0.0970                                                        | 0.0876                                                        | 0.0874                                                        |
| <i>S</i>                                 | 1.03                                                         | 0.98                                                          | 1.06                                                          | 1.02                                                          |
| Resd. Dens.<br>[e Å <sup>-3</sup> ]      | -0.22, 0.29                                                  | -0.24, 0.22                                                   | -0.22, 0.33                                                   | -0.22, 0.28                                                   |
| Device type                              | Oxford Xcalibur3<br>CCD                                      | Oxford Xcalibur3<br>CCD                                       | Oxford Xcalibur3<br>CCD                                       | Oxford Xcalibur3<br>CCD                                       |
| Solution                                 | SIR-92                                                       | SIR-92                                                        | SHELXS-97                                                     | SIR-92                                                        |
| Refinement                               | SHELXL-97                                                    | SHELXL-97                                                     | SHELXL-97                                                     | SHELXL-97                                                     |
| Absorpt. corr.                           | multi-scan                                                   | multi-scan                                                    | multi-scan                                                    | multi-scan                                                    |
| CCDC                                     | 988404                                                       | 988413                                                        | 988410                                                        | 988411                                                        |

## 2 Computations

### 2.1 Heat of Formation

All calculations were carried out using the Gaussian G09 program package<sup>[S8]</sup>. The enthalpies (H) and free energies (G) were calculated using the complete basis set (CBS) method of Petersson and coworkers in order to obtain very accurate energies. The CBS models use the known asymptotic convergence of pair natural orbital expressions to extrapolate from calculations using a finite basis set to the estimated CBS limit. CBS-4 begins with an HF/3-21G(d) geometry optimization; the zero point energy is computed at the same level. It then uses a large basis set SCF calculation as a base energy, and an MP2/6-31+G calculation with a CBS extrapolation to correct the energy through second order. An MP4(SDQ)/6-31+ (d,p) calculation is used to approximate higher order contributions. In this study, we applied the modified CBS-4M method (**M** referring to the use of Minimal Population localization) which is a re-parametrized version of the original CBS-4 method and also includes some additional empirical corrections<sup>[S9,S10]</sup>.

The calculated gas phase enthalpies of formation  $\Delta_f H^\circ(\text{g})$  were converted into the solid state enthalpies of formation ( $\Delta H_m(\text{s})$ ) by (i) for neutrals: subtraction of sublimation enthalpy, calculated by the "Troutons' rule" ( $\Delta H_{sub} [\text{kJ mol}] = 188 \cdot T_m[\text{K}]$ )<sup>[S11]</sup> (ii) for ionics: using the Jenkins and Glasser equations<sup>[S12]</sup> based on the molecular volumes  $V_M$  (taken from X-ray structures) in order to calculate the lattice energies ( $\Delta E_L$ ) and enthalpies ( $\Delta H_L$ ).

$$\Delta_f H^\circ_{(\text{g, M, 298})} = H_{(\text{Molecule, 298})} - \sum H^\circ_{(\text{Atoms, 298})} + \sum \Delta_f H^\circ_{(\text{Atoms, 298})} \quad (1)$$

Lastly, the molar standard enthalpies of formation ( $\Delta_f H_m$ ) were used to calculate the molar solid state energies of formation ( $\Delta U_m$ ) according to equation (2).

$$\Delta U_m = \Delta H_m - \Delta n RT \quad (2)$$

( $\Delta n$  being the change of moles of gaseous components)

**Table S4.** CBS-4M calculation results, molecular volumes taken from X-ray solution and calculated lattice enthalpy.

| M                                             | $-H^{298}$ / a.u. | $\Delta_f H^\circ(\text{g,M})$ / kJ mol <sup>-1</sup> | $V_M$ /<br>nm <sup>3</sup> | $\Delta E_L, \Delta H_L$ ( <b>15–17, 20, 23</b> );<br>$\Delta H_{sub}$ ( <b>3,4</b> ) / kJ mol <sup>-1</sup> | $\Delta n$ |
|-----------------------------------------------|-------------------|-------------------------------------------------------|----------------------------|--------------------------------------------------------------------------------------------------------------|------------|
| <b>3</b>                                      | 709.121081        | 238.8                                                 |                            | 88.6                                                                                                         | 7.5        |
| <b>4</b>                                      | 784.204956        | 244.5                                                 |                            | 85.2                                                                                                         | 8          |
| <b>BOTFAZ</b><br><b>dianion</b>               | 924.24619         | 720.7                                                 |                            |                                                                                                              |            |
| <b>BOTFOX</b><br><b>dianion</b>               | 999.336611        | 709.6                                                 |                            |                                                                                                              |            |
| <b>NH<sub>4</sub><sup>+</sup></b>             | 56.796608         | 645.8                                                 |                            |                                                                                                              |            |
| <b>NH<sub>4</sub>O<sup>+</sup></b>            | 131.863249        | 687.2                                                 |                            |                                                                                                              |            |
| <b>N<sub>2</sub>H<sub>5</sub><sup>+</sup></b> | 112.030523        | 774.1                                                 |                            |                                                                                                              |            |
| <b>G<sup>+</sup></b>                          | 205.453192        | 571.9                                                 |                            |                                                                                                              |            |
| <b>AG<sup>+</sup></b>                         | 260.701802        | 671.6                                                 |                            |                                                                                                              |            |
| <b>15</b>                                     |                   | 1992.4                                                | 0.2681                     | 1359.3, 1366.7                                                                                               | 11.5       |
| <b>16</b>                                     |                   | 1981.2                                                | 0.2738                     | 1348.6, 1359.5                                                                                               | 12         |
| <b>17</b>                                     |                   | 2269.0                                                | 0.2933                     | 1314.0, 1321.4                                                                                               | 13.5       |
| <b>20</b>                                     |                   | 1853.4                                                | 0.366                      | 1207.6, 1215.1                                                                                               | 16         |
| <b>23</b>                                     |                   | 2052.8                                                | 0.4067                     | 1160.0, 1167.4                                                                                               | 18         |

## 2.2 Detonation Parameters

The calculation of the detonation parameters was performed with the program package EXPLO5 (version 5.05)<sup>[S13]</sup>. The program is based on the chemical equilibrium, steady-state model of detonation. It uses the Becker–Kistiakowsky–Wilson's equation of state (BKW EOS) for gaseous detonation products and Cowan–Fickett's equation of state for solid carbon. The calculation of the equilibrium composition of the detonation products is done by applying modified White, Johnson and Dantzig's free energy minimization technique. The program is designed to enable the calculation of detonation parameters at the CJ point. The BKW equation in the following form was used with the BKWN set of parameters ( $\alpha$ ,  $\beta$ ,  $\kappa$ ,  $\theta$ ) as stated below the equations and  $X_i$  being the mol fraction of  $i$ -th gaseous product,  $k_i$  is the molar covolume of the  $i$ -th gaseous product:<sup>[S14]</sup>

$$pV/RT = 1 + xe^{\beta x} \quad x = (\kappa \sum X_i k_i) / [V(T + \theta)]^{\alpha}$$

$$\alpha = 0.5, \beta = 0.176, \kappa = 14.71, \theta = 6620.$$

## 3 Experimental Procedures

Raman spectra were recorded with a Bruker MultiRAM FT-Raman instrument fitted with a liquid-nitrogen-cooled germanium detector and a Nd:YAG laser ( $\lambda = 1064$  nm), infrared spectra were measured with a Perkin–Elmer Spectrum BX-FTIR spectrometer equipped with a Smiths DuraSamplIR II ATR device. All spectra were recorded at ambient temperature; the samples were neat solids. NMR spectra were recorded with a JEOL Eclipse 400 ECX instrument, all samples were measured at 25 °C. Mass spectrometric data were obtained with a JEOL MStation JMS 700 spectrometer (DEI<sup>+</sup> / FAB<sup>+/-</sup>). C/H/N analysis was carried out by the department's internal micro analytical laboratory on a *Elementar Vario el* by pyrolysis of the sample and subsequent analysis of the formed gases. Differential Scanning Calorimetry (DSC) was performed on a *LINSEIS DSC PT10* with about 1 mg substance in a perforated aluminum vessel and a heating rate of 5 K min<sup>-1</sup> and a nitrogen steam of 5 L h<sup>-1</sup>. Melting points were determined in the same way. The sensitivities of the compounds were determined according to the BAM (German: Bundesanstalt für Materialforschung und Prüfung) standard for friction and impact<sup>[S15]</sup>. The impact sensitivities were tested according to STANAG 4489 modified instruction using a

BAM drophammer. The friction sensitivities were tested according to STANAG 4487 modified instructions using a BAM friction tester. The tested compounds were classified from the results by the “UN Recommendations on the Transport of Dangerous Goods”. Additionally all compounds were tested for sensitivity towards electrical discharge using an Electric Spark Tester ESD 2010 EN<sup>[S16]</sup>.

## 4

## References

- [S1] *CrysAlisPro*, Oxford Diffraction Ltd., version 171.33.41, **2009**.
- [S2] *SIR-92, A program for crystal structure solution*: A. Altomare, G. Cascarano, C. Giacovazzo, A. Guagliardi, *J. Appl. Crystallogr.* **1993**, 26, 343.
- [S3] a) A. Altomare, G. Cascarano, C. Giacovazzo, A. Guagliardi, A. G. G. Moliterni, M. C. Burla, G. Polidori, M. Camalli, R. Spagna, *SIR97*, **1997**; b) A. Altomare, M. C. Burla, M. Camalli, G. L. Cascarano, C. Giacovazzo, A. Guagliardi, A. G. G. Moliterni, G. Polidori, R. Spagna, *J. Appl. Crystallogr.* **1999**, 32, 115–119.
- [S4] a) G. M. Sheldrick, *SHELX-97*, University of Göttingen, Göttingen, Germany, **1997**; b) G. M. Sheldrick, *Acta Crystallogr., Sect. A* **2008**, 64, 112–122.
- [S5] A. L. Spek, *PLATON, A Multipurpose Crystallographic Tool*, Utrecht University, The Netherlands, **1999**.
- [S6] L.J. Farrugia, *J. Appl. Cryst.*, **1999**, 32, 837–838.
- [S7] *SCALE3 ABSPACK – An Oxford Diffraction program* (1.0.4, gui: 1.0.3), Oxford Diffraction Ltd., **2005**.
- [S8] Gaussian 09, Revision A.1, M. J. Frisch, G. W. Trucks, H. B. Schlegel, G. E. Scuseria, M. A. Robb, J. R. Cheeseman, G. Scalmani, V. Barone, B. Mennucci, G. A. Petersson, H. Nakatsuji, M. Caricato, X. Li, H. P. Hratchian, A. F. Izmaylov, J. Bloino, G. Zheng, J. L. Sonnenberg, M. Hada, M. Ehara, K. Toyota, R. Fukuda, J. Hasegawa, M. Ishida, T. Nakajima, Y. Honda, O. Kitao, H. Nakai, T. Vreven, J. A. Montgomery, Jr., J. E. Peralta, F. Ogliaro, M. Bearpark, J. J. Heyd, E. Brothers, K. N. Kudin, V. N. Staroverov, R.



- Kobayashi, J. Normand, K. Raghavachari, A. Rendell, J. C. Burant, S. S. Iyengar, J. Tomasi, M. Cossi, N. Rega, J. M. Millam, M. Klene, J. E. Knox, J. B. Cross, V. Bakken, C. Adamo, J. Jaramillo, R. Gomperts, R. E. Stratmann, O. Yazyev, A. J. Austin, R. Cammi, C. Pomelli, J. W. Ochterski, R. L. Martin, K. Morokuma, V. G. Zakrzewski, G. A. Voth, P. Salvador, J. J. Dannenberg, S. Dapprich, A. D. Daniels, Ö. Farkas, J. B. Foresman, J. V. Ortiz, J. Cioslowski, and D. J. Fox, Gaussian, Inc., Wallingford CT, **2009**.
- [S9] (a) J. W. Ochterski, G. A. Petersson, and J. A. Montgomery Jr., A complete basis set model chemistry. V. Extensions to six or more heavy atoms, *J. Chem. Phys.* **1996**, *104*, 2598; (b) J. A. Montgomery Jr., M. J. Frisch, J. W. Ochterski G. A. Petersson, A complete basis set model chemistry. VII. Use of the minimum population localization method, *J. Chem. Phys.* **2000**, *112*, 6532.
- [S10] (a) L. A. Curtiss, K. Raghavachari, P. C. Redfern, J. A. Pople, Assessment of Gaussian-2 and density functional theories for the computation of enthalpies of formation, *J. Chem. Phys.* **1997**, *106(3)*, 1063; (b) E. F. C. Byrd, B. M. Rice, Improved prediction of heats of formation of energetic materials using quantum mechanical calculations, *J. Phys. Chem. A* **2006**, *110(3)*, 1005–1013; (c) B. M. Rice, S. V. Pai, J. Hare, Predicting heats of formation of energetic materials using quantum mechanical calculations, *Combust. Flame* **1999**, *118(3)*, 445–458.
- [S11] M. S. Westwell, M. S. Searle, M. S.; Wales, D. J.; Williams, D. H. *J. Am. Chem. Soc.* 1995, **117**, 5013; (b) Trouton, F. *Philos. Mag.* 1884, **18**, 54.
- [S12] (a) H. D. B. Jenkins, H. K. Roobottom, J. Passmore, L. Glasser, *Inorg. Chem.* 1999, **38**, 3609. (b) Jenkins, H. D. B.; Tudela, D.; Glasser, L. *Inorg. Chem.* 2002, **41**, 2364.
- [S13] M. Sućeska, *EXPLO5.05 program*, Zagreb, Croatia, **2012**.
- [S14] a) M. Sućeska, Calculation of Detonation Parameters by EXPLO5 Computer Program, *Mater. Sci. Forum* 2004, **465–466**, 325; b) M. Sućeska, Calculation of the Detonation Properties of C–H–N–O Explosives, *Propellants, Explos., Pyrotech.* **1991**, *16*, 197; c) M. Sućeska, Evaluation of Detonation Energy from EXPLO5 Computer Code Results, *Propellants, Explos., Pyrotech.*

**1999**, 24, 280; d) M. L. Hobbs, M. R. Baer, Calibrating the BKW-EOS with a Large Product Species Data Base and Measured C-J Properties *Proc. of the 10th Symp. (International) on Detonation*, ONR 33395-12, Boston, MA, July 12–16, **1993**, p. 409.

[S9] a) Reichel & Partner GmbH, <http://www.reichelt-partner.de>; b) Test methods according to the UN Recommendations on the Transport of Dangerous Goods, *Manual of Test and Criteria*, fourth revised edition, United Nations Publication, New York and Geneva, **2003**, ISBN 92–1-139087–7, Sales No. E.03.VIII.2; 13.4.2 Test 3 a (ii) BAM Fallhammer; c) , <http://www.bam.de>
